# Supplementary material for: Interaction network of tobacco etch potyvirus NIa protein with the host proteome during infection
Source: PubMed Central journal article supplement (PMC4735970; doi:10.1186/s12864-016-2394-y), 2016-02-01
Supplement: 12864_2016_2394_MOESM1_ESM.pdf [file 12864_2016_2394_MOESM1_ESM.pdf]

**Additional file 1: cDNA sequences of wild-type NIa (from nucleotide 5692 to 6981 of GenBank accession DQ986288) and the five tagged variants TSTNIa1 to 5.** Twin-Strep-tag (TST) sequence is on yellow background; codons corresponding to amino acids binding Strep-Tactin and to spacers in blue and gray, respectively. Positions corresponding to the different NIaPro autoproteolytic sites are on blue background. Mutation C6037T that increases viral load and infectivity in *A. thaliana* Ler-0 is in red. In TSTNIa1 and TSTNIa3 the three codons in front of TST are duplicated (*italics*) after the tag, but include a silent mutation (in red) to avoid homologous repetitions.

>NIa

GGGAAGAAGAATCAGAAGCACAAGCTTAAGATGAGAGAGGCGCGTGGGGCTAGAGGGCAATATGAGGTTGCAGCG  
 GAGCCAGAGGCGCTAGAACATTACTTTGGAAGCGCATATAATAACAAAGGAAAGCGCAAGGGCACCACGAGAGGA  
 ATGGGTGCAAAGTCTCGGAAATTCATAAACATGTATGGGTTTGTATCCAAGTATTTTCATACATTAGGTTTGTG  
 GATCCATTGACAGGTCACACTATTGATGAGTCCACAAACGCACCTATTGATTTAGTGCAGCATGAGTTTGGAAAG  
 GTTAGAACACGCATGTTAATTGACGATGAGATAGAGCCTCAAAGTTTTAGCACCCACACCACAATCCATGCTTAT  
 TTGGTGAATAGTGGCACGAAGAAAGTTCTTAAGGTTGATTTAACACCACACTCGTCGCTACGTGCGAGTGAGAAA  
 TCAACAGCAATAATGGGATTTCTGAAAGGGGAGAATGAATTCGCTCAAACCGGCATGGCAGTGCCAGTGGCTTAT  
 GATCAATTGCCACCAAGAGTGAGGACTTGACGTTTGAAGGAGAAAGCTTGTTTAAGGGACCACGTGATTACAAC  
 CCGATATCGAGCACCATTTGTCACTTGACGAATGAATCTGATGGGCACACAACATCGTTGTATGGTATTGGATTT  
 GGTCCCTTCATCATTACAAACAAGCACTTGTTTAGAAGAAATAATGGAACTGTTGGTCCAATCACTACATGGT  
 GTATTCAAGGTCAAGAACCACGACTTTGCAACAACACCTCATTGATGGGAGGGACATGATAATTATTCGCATG  
 CCTAAGGATTTCCACCATTTCTCAAAGCTGAAATTTAGAGAGCCACAAAGGGAAGAGCGCATATGCTTTGTG  
 ACAACCAACTTCCAACTAAGAGCATGTCTAGCATGGTGTGACACTAGTTGCACATTCCTTCATCTGATGGC  
 ATATTCTGGAAGCATTGGATTCAAACCAAGGATGGGCAGTGGCAGTCCATTAGTATCAACTAGAGATGGGTTT  
 ATTGTTGGTATACACTCAGCATCGAATTTACCAACACAAACAATTATTTACAAGCGTGCCGAAAACTTCATG  
 GAATTTGACAAATCAGGAGGCGCAGCAGTGGGTTAGTGGTTGGCGATTAAATGCTGACTCAGTATTTGTGGGG  
 GGCCATAAAGTTTTTCATCAGCAAACCTGAAGAGCCTTTTCAGCCAGTTAAGGAAGCGACTCAACTCATGAGTGAA  
 TTGGTGTACTCGCAA

>TSTNIa1

GGGAAGAAGAGCGCATGGAGTCATCCTCAATTCGAGAAAAGGTGGAGGTTCTGGCGGTGGATCGGGAGGTTTCAGCG  
 TGGAGCCACCCGCGAGTTCGAAAAATCCGGAAGGAAAGAATCAGAAGCACAAGCTTAAGATGAGAGAGGCGCGT  
 GGGGCTAGAGGGCAATATGAGGTTGCAGCGGAGCCAGAGGCGCTAGAACATTACTTTGGAAGCGCATATAATAAC  
 AAAGGAAAGCGCAAGGGCACCACGAGAGGAATGGGTGCAAAGTCTCGGAAATTCATAAACATGTATGGGTTTGT  
 CCAACTGATTTTTTCATACATTAGGTTTGTGGATCCATTGACAGGTCACACTATTGATGAGTCCACAAACGCACCT  
 ATTGATTTAGTGCAGCATGAGTTTGGAAAGGTTAGAACACGCATGTTAATTGACGATGAGATAGAGCCTCAAAGT  
 TTTAGCACCCACACCACAATCCATGCTTATTTGGTGAATAGTGGCACGAAGAAAGTTCTTAAGGTTGATTTAACA  
 CCACACTCGTCGCTACGTGCGAGTGAGAAATCAACAGCAATAATGGGATTTCTGAAAGGGGAGAATGAATTCGCT  
 CAAACCGGCATGGCAGTGCAGTGGCTTATGATCAATTGCCACCAAAGAGTGAGGACTTGACGTTTGAAGGAGAA  
 AGCTTGTTTAAGGGACACGTGATTACAACCCGATATCGAGCACCATTGTCACTTGACGAATGAATCTGATGGG  
 CACACAACATCGTTGTATTGGATTTGGTCCCTTCATCATTAACAACAAGCACTTGTTTAGAAGAAATAAT  
 GGAACACTGTTGGTCCAATCACTACATGGTGTATTCAAGTCAAGAACCACGACTTTGCAACAACACACTCATT  
 GATGGGAGGGACATGATAATTATTCGCATGCCTAAGGATTTCCACCATTTCCTCAAAGCTGAAATTTAGAGAG  
 CCACAAAGGGAAGAGCGCATATGCTTTGTGACAACCAACTTCCAACTAAGAGCATGTCTAGCATGGTGTGACAC  
 ACTAGTTGCACATTCCTTCATCTGATGGCATATTCTGGAAGCATTGGATTCAAACCAAGGATGGGCAGTGTGGC  
 AGTCCATTAGTATCAACTAGAGATGGGTTTATTGTTGGTATACACTCAGCATCGAATTTACCAACACAAACAAT  
 TATTTACAAGCGTGCCGAAAACTTCATGGAATTTGTGACAAATCAGGAGGCGCAGCAGTGGGTTAGTGGTTGG  
 CGATTAAATGCTGACTCAGTATTGTGGGGGGCCATAAAGTTTTTCATCAGCAAACCTGAAGAGCCTTTTCAGCCA  
 GTTAAGGAAGCGACTCAACTCATGAGTGAATTTGGTGTACTCGCAA

>TSTNIa2

GGGAAGAAGAATCAGAAGCACAAGCTTAAGATGAGAGAGGCGCGTGGGGCTAGAGGGCAATATGAGGTTGCAGCG  
 GAGCCAGAGGCGCTAGAACATTACTTTGGAAGCGCATATAATAACAAAGGAAAGCGCAAGGGCACCACGAGAGGA  
 ATGGGTGCAAAGTCTCGGAAATTCATAAACATGTATGGGTTTGTATCCAAGTATTTTCATACATTAGGTTTGTG  
 GATCCATTGACAGGTCACACTATTGATGAGTCCACAAACGCACCTATTGATTTAGTGCAGCATGAGTTTGGAAAG  
 GTTAGAACACGCATGTTAATTGACGATGAGATAGAGCCTCAAAGTTTTAGCACCCACACCACAATCCATGCTTAT  
 TTGGTGAATAGTGGCACGAAGAAAGTTCTTAAGGTTGATTTAACACCACACTCGTCGCTACGTGCGAGTGAGAAA  
 TCAACAGCAATAATGGGATTTCTGAAAGGGGAGAATGAATTCGCTCAAACCGGCATGGCAGTGCCAGTGGCTTAT  
 GATCAATTGCCACCAAGCGCATGGAGTCATCCTCAATTCGAGAAAAGGTGGAGGTTCTGGCGGTGGATCGGGAGGTT

TCAGCGTGGAGCCACCCGCGAGTTCGAAAAATCCGGA AAGAGTGAGGACTTGACGTTTGAAGGAGAAAGCTTGTTT  
AAGGGACCACGTGATTACAACCCGATATCGAGCACCATTTGTCACTTGACGAATGAATCTGATGGGCACACAACA  
TCGTTGTATGGTATTGGATTTGGTCCCTTCATCATTACAAACAAGCACTTGTTTTAGAAGAAAATAATGGAACACTG  
TTGGTCCAATCACTACATGGTGTATTCAAGGTCAAGAACCACGACTTTGCAACAACACCTCATTGATGGGAGG  
GACATGATAATTATTTCGCATGCCTAAGGATTTCCACCATTTCTCAAAGCTGAAATTTAGAGAGCCACAAAGG  
GAAGAGCGCATATGTCTTGTGACAACCAACTTCCAACTAAGAGCATGTCTAGCATGGTGTGAGACACTAGTTGC  
ACATTCCTTCATCTGATGGCATATTCTGGAAGCATTGGATTCAAACCAAGGATGGGCAGTGTGGCAGTCCATTA  
GTATCAACTAGAGATGGGTTTATTGTTGGTATACACTCAGCATCGAATTTACCAACACAAACAATTTATTCACA  
AGCGTGCCGAAAACTTCATGGAATTGTTGACAAATCAGGAGGCCGAGCAGTGGGTTAGTGGTTGGCGATTAAAT  
GCTGACTCAGTATTGTGGGGGGCCATAAAGTTTTTCATGAGCAAACCTGAAGAGCCTTTTCAGCCAGTTAAGGAA  
GCGACTCAACTCATGAGTGAATTGGTGTACTCGCAA

>TSTNIa3

GGGAAGAAGAATCAGAAGCACAAGCTTAAGATGAGAGAGGCGCGTGGGGCTAGAGGGCAATATGAGGTTGCAGCG  
GAGCCAGAGGCGCTAGAACATTACTTTGGAAGCGCATATAATAACAAAGGAAAGCGCAAGGGCACCACGAGAGGA  
ATGGGTGCAAAGTCTCGGAAATTCATAAACATGTATGGGTTTGTATCCAACCTGATTTTTTCATACATTAGGTTTGTG  
GATCCATTGACAGGTCACACTATTGATGAGTCCACAAACGCACCTATTGATTTAGTGCAGCATGAGTTTGAAAG  
GTTAGAACACGCATGTTAATTGACGATGAGATAGAGCCTCAAAGT TTTAGCACCCACACCACAATCCATGCTTAT  
TTGGTGAATAGTGGCACGAAGAAAGTTCTTAAGGTTGATTTAACACCACACTCGTCGCTACGTGCGAGTGAGAAA  
TCAACAGCAATAATGGGATTTCTGAAAGGGGAGAATGAATTGCGTCAAACCGGCATGGCAGTGGCAGTGGCTTAT  
GATCAATTGCCACCAAAGAGTGAGGACTTGACGTTTGAAGGAGAAAGCAGCGCATGGAGTTCATCCTCAATTCCGAG  
AAAGGTGGAGGTTCTGGCGGTGGATCGGGAGGTTGAGCGTGGAGCCACCCGCGAGTTCGAAAAATCCGGA GGAGAG  
AGCTTGTTTAAGGGACCACGTGATTACAACCCGATATCGAGCACCATTTGTCACTTGACGAATGAATCTGATGGG  
CACACAACATCGTTGTATGGTATTGGATTTGGTCCCTTCATCATTACAAACAAGCACTTGTTTAGAAGAAAATAAT  
GGAACACTGTTGGTCCAATCACTACATGGTGTATTCAAGGTCAAGAACCACGACTTTGCAACAACACCTCAT  
GATGGGAGGACATGATAATTATTTCGCATGACATAAGGATTTCCACCATTTCTCAAAGCTGAAATTTAGAGAG  
CCACAAGGGAAGAGCGCATATGTCTTGTGACAACCAACTTCCAACTAAGAGCATGTCTAGCATGGTGTGAGAC  
ACTAGTTGCACATTTCCCTTCATCTGATGGCATATTCTGGAAGCATTGGATTCAAACCAAGGATGGGCGATGTGGC  
AGTCCATTAGTATCAACTAGAGATGGGTTTATTGTTGGTATACACTCAGCATCGAATTTACCAACACAAACAAT  
TATTTACAAGCGTGCCGAAAACTTCATGGAATTGTTGACAAATCAGGAGGCCGAGCAGTGGGTTAGTGGTTGG  
CGATTAATGCTGACTCAGTATTGTGGGGGGCCATAAAGTTTTTCATGAGCAAACCTGAAGAGCCTTTTCAGCCA  
GTTAAGGAAGCGACTCAACTCATGAGTGAATTGGTGTACTCGCAA

>TSTNIa4

GGGAAGAAGAATCAGAAGCACAAGCTTAAGATGAGAGAGGCGCGTGGGGCTAGAGGGCAATATGAGGTTGCAGCG  
GAGCCAGAGGCGCTAGAACATTACTTTGGAAGCGCATATAATAACAAAGGAAAGCGCAAGGGCACCACGAGAGGA  
ATGGGTGCAAAGTCTCGGAAATTCATAAACATGTATGGGTTTGTATCCAACCTGATTTTTTCATACATTAGGTTTGTG  
GATCCATTGACAGGTCACACTATTGATGAGTCCACAAACGCACCTATTGATTTAGTGCAGCATGAGTTTGAAAG  
GTTAGAACACGCATGTTAATTGACGATGAGATAGAGCCTCAAAGT TTTAGCACCCACACCACAATCCATGCTTAT  
TTGGTGAATAGTGGCACGAAGAAAGTTCTTAAGGTTGATTTAACACCACACTCGTCGCTACGTGCGAGTGAGAAA  
TCAACAGCAATAATGGGATTTCTGAAAGGGGAGAATGAATTGCGTCAAACCGGCATGGCAGTGGCAGTGGCTTAT  
GATCAATTGCCACCAAAGAGTGAGGACTTGACGTTTGAAGGAGAAAGCTTGTTTAAGGGACCACGTGATTACAAC  
CCGATATCGAGCACCATTTTGTCACTTGACGAATGAATCTGATGGGCACACAACATCGTTGTATGGTATTGGATTT  
GGTCCCTTCATCATTACAAACAAGCACTTGTGTTAGAAGAAAATAATGGAACACTGTTGGTCCAATCACTACATGTT  
GTATTCAAGGTCAAGAACCACGACTTTGCAACAACACCTCATTGATGGGAGGGACATGATAATTTATTCGCATG  
CCTAAGGATTTCCACCATTTCTCAAAGCTGAAATTTAGAGAGCCACAAAGGGAAGAGCGCATATGTCTTGTG  
ACAACCAACTTCCAACTAAGAGCATGTCTAGCATGGTGTGAGACACTAGTTGCACATTTCCCTTCATCTGATGGC  
ATATTCTGGAAGCATTGGATTCAAACCAAGGATGGGCGAGTGTGGCAGTCCATTAGTATCAACTAGAGATGGGTTT  
ATTGTTGGTATACACTCAGCATCGAATTTACCAACACAAACAATTTTACAAGCGTGCCGAAAACTTCATG  
GAATTGTTGACAAATCAGGAGGCCGAGCAGTGGGTTAGTGGTTGGCGATTAAATGCTGACTCAGTATTGTGGAGC  
GCATGGAGTTCATCCTCAATTGAGAAAAGGTGGAGGTTCTGGCGGTGGATCGGGAGGTTGAGCGTGGAGCCACCCG  
CAGTTCGAAAAATCCGGA GGGGGCCATAAAGTTTTTCATGAGCAAACCTGAAGAGCCTTTTCAGCCAGTTAAGGAA  
GCGACTCAACTCATGAGTGAATTGGTGTACTCGCAA

>TSTNIa5

GGGAAGAAGAATCAGAAGCACAAGCTTAAGATGAGAGAGGCGCGTGGGGCTAGAGGGCAATATGAGGTTGCAGCG  
GAGCCAGAGGCGCTAGAACATTACTTTGGAAGCGCATATAATAACAAAGGAAAGCGCAAGGGCACCACGAGAGGA  
ATGGGTGCAAAGTCTCGGAAATTCATAAACATGTATGGGTTTGTATCCAACCTGATTTTTTCATACATTAGGTTTGTG  
GATCCATTGACAGGTCACACTATTGATGAGTCCACAAACGCACCTATTGATTTAGTGCAGCATGAGTTTGAAAG  
GTTAGAACACGCATGTTAATTGACGATGAGATAGAGCCTCAAAGT TTTAGCACCCACACCACAATCCATGCTTAT  
TTGGTGAATAGTGGCACGAAGAAAGTTCTTAAGGTTGATTTAACACCACACTCGTCGCTACGTGCGAGTGAGAAA

TCAACAGCAATAATGGGATTTCTGAAAGGGAGAATGAATTGCGTCAAACCGGCATGGCAGTGCCAGTGGCTTAT  
GATCAATTGCCACCAAAGAGTGAGGACTTGACGTTTGAAGGAGAAAAGCTTGTTTAAGGGACCACGTGATTACAAC  
CCGATATCGAGCACCATTTGTCACTTGACGAATGAATCTGATGGGCACACAACATCGTTGTATGGTATTTGGATTT  
GGTCCCTTCATCATTACAAACAAGCACTTGTTTTAGAAGAAAATAATGGAACACTGTTGGTCCAATCACTACATGGT  
GTATTCAAGGTCAAGAACACCACGACTTTGCAACAACACCTCATTGATGGGAGGGACATGATAATTATTCGCATG  
CCTAAGGATTTCCCACCATTTCTCCTCAAAGCTGAAATTTAGAGAGCCACAAAGGGAAGAGCGCATATGTCTTGTG  
ACAACCAACTTCCAAACTAAGAGCATGTCTAGCATGGTGTGAGACACTAGTTGCACATTCCTTCATCTGATGGC  
ATATTCTGGAAGCATTGGATTCAAACCAAGGATGGGCAGTGTGGCAGTCCATTAGTATCAACTAGAGATGGGTTC  
ATTGTTGGTATACACTCAGCATCGAATTTACCAACACAAACAATTATTTACAAGCGTGCCGAAAACTTCATG  
GAATTGTTGACAAATCAGGAGGCGCAGCAGTGGGTAGTGGTTGGCGATTAAATGCTGACTCAGTATTTGTGGGGG  
GGCCATAAAGTTTTTCATGAGCAAACCTGAAGAGCCTTTTCAGCCAGTTAAGGAAGCGACTCAACTCAGCGCATGG  
AGTCATCCTCAATTCGAGAAAAGGTGGAGGTTCTGGCGGTGGATCGGGAGGTTTCAGCGTGGAGCCACCCGAGTTC  
GAAAAATCCGGAATGAGTGAATTGGTGTACTCGCAA
