# Supplementary material for: Interaction network of tobacco etch potyvirus NIa protein with the host proteome during infection
Source: PubMed Central journal article supplement (PMC4735970; doi:10.1186/s12864-016-2394-y), 2016-02-01

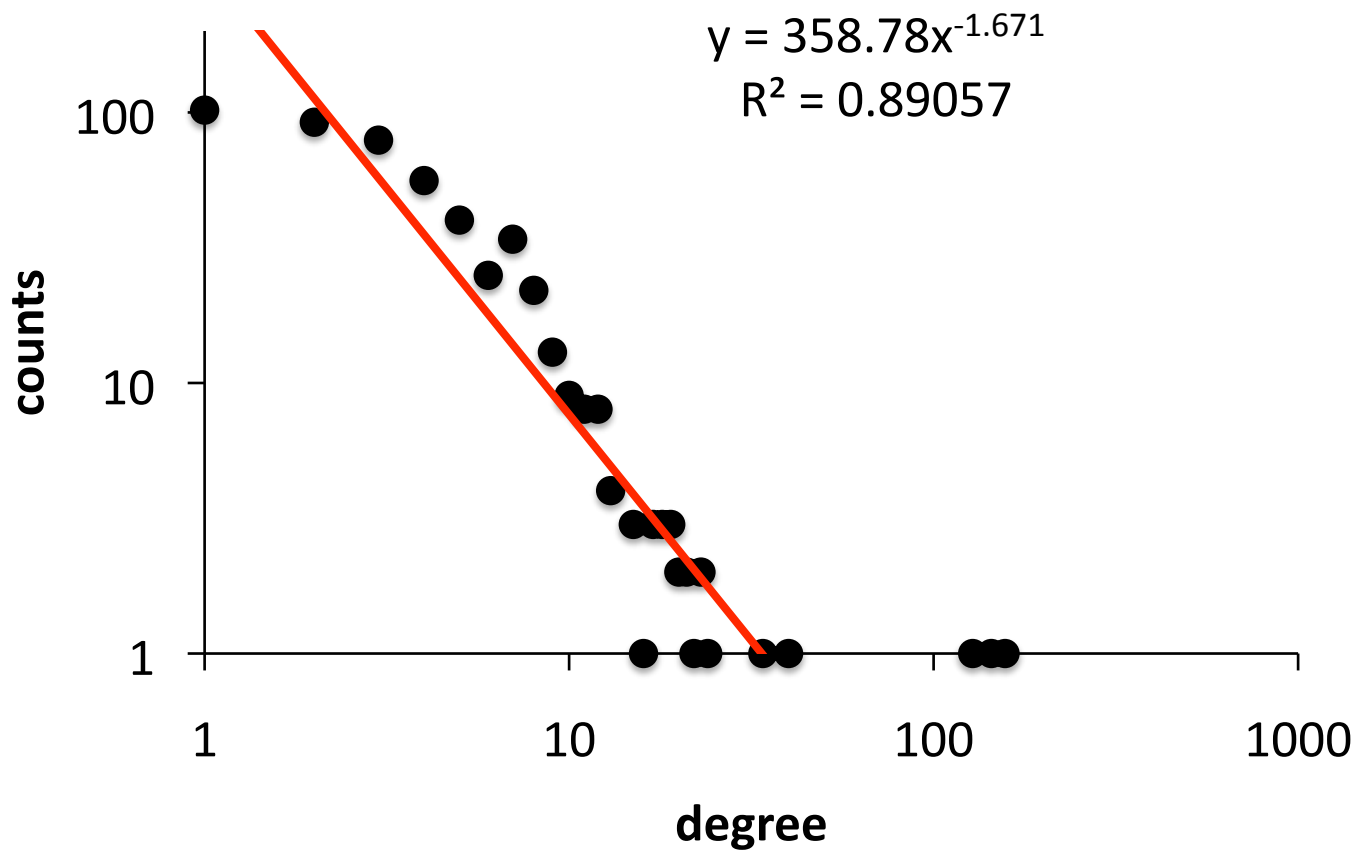

Supplement: 12864_2016_2394_MOESM6_ESM.pdf [file 12864_2016_2394_MOESM6_ESM.pdf]
